# Supplementary material for: Kinematics and Aerodynamics of Dragonflies (Pantala flavescens, Libellulidae) in Climbing Flight
Source: Front Bioeng Biotechnol. 2022 Mar 16;10:795063. doi: 10.3389/fbioe.2022.795063 (PMC8966397; doi:10.3389/fbioe.2022.795063)
Supplement: Supplementary file 2 [file Table3.XLSX]

## Sheet: LAC_forewing
t	flapping angle	rotational angle	deviation angle
0.85	-36.7	93.97	-5.52
3.05	-31.13	70.2	-5.85
5.59	-15.85	53.91	-6.26
6.86	-4.6	47.11	-6.49
9.14	18.93	45.87	-6.97
11.77	35.91	45.3	-7.57
13.71	40.66	54.58	-8.02
15.83	44.74	69.29	-8.46
18.62	39.3	98.39	-8.85
20.15	31.98	123.51	-8.93
22.26	16.21	137.76	-8.85
24.38	6.16	144.23	-8.55
27.09	-12.99	143.58	-7.88
28.36	-23.85	141.73	-7.49
30.47	-33.36	128.82	-6.77
32.08	-36.22	107.22	-6.22
33.61	-35.96	93.97	-5.73
35.55	-28.08	76.66	-5.21
37.75	-12.41	59.68	-4.82
39.28	2.29	49.83	-4.68
41.14	14.86	46.65	-4.67
44.7	36.4	48.13	-5.01
46.9	44.04	65.79	-5.33
48.5	46.44	79.72	-5.55
51.72	38.57	108.57	-5.73
52.99	34.36	118.42	-5.66
55.02	26.06	135.79	-5.34
56.88	12.6	138.46	-4.81
58.83	0.5	138.8	-4.04
61.03	-18.72	134.72	-2.95
62.9	-29.92	122.5	-1.93
63.91	-32.34	105.75	-1.37
66.37	-35.11	80.05	-0.06
69.5	-24.98	56.28	1.26
71.28	-12.6	47.79	1.74
73.14	-3.82	42.56	2.01
74.32	14.66	41.34	2.05
76.44	23.35	42.67	1.9
78.3	31.29	45.08	1.57
79.4	35.99	53.23	1.31
81.26	40.66	77.08	0.82
82.36	41.13	92.62	0.52
84.14	38.68	117.4	0.06
85.16	35	127.59	-0.16
86.85	24.36	136.04	-0.46
88.88	9.76	138.19	-0.66
91.59	-4.16	138.3	-0.64
92.61	-18.42	135.91	-0.55
94.47	-26.33	117.74	-0.29
95.65	-29.89	105.86	-0.08
98.28	-36.08	82.64	0.43
100.73	-34.57	62.39	0.88
102.51	-23.61	52.55	1.14
103.53	-16.87	47.45	1.24
105.3	-5.52	45.6	1.36
107.67	12.82	46.44	1.37
109.54	19.55	51.19	1.29
111.06	26.37	60.36	1.19
112.5	36.93	73.9	1.09
114.53	41.75	98.05	0.99
115.97	42.36	116.34	0.96
118.43	35	135.4	1.06
119.27	30.36	139.81	1.14
121.13	18.25	144.86	1.42
122.66	5.18	143.89	1.74
124.1	-7.42	143.55	2.12
125.11	-12.58	137.78	2.42
126.72	-17.46	121.82	2.94
128.33	-24.87	112.31	3.5
131.55	-34.13	81.41	4.62
134.09	-34.72	58.02	5.42
135.61	-25.9	50.51	5.84
136.54	-18.31	47.11	6.06
139.08	-4.23	45.76	6.56
140.1	4.69	45.76	6.72
141.7	24.36	48.85	6.91
143.65	31.74	65.45	7.07
145.26	37.43	80.05	7.15
147.38	46.77	101.68	7.19
149.66	44.89	119.44	7.16

## Sheet: LAC_hindwing
t	flapping angle	rotational angle	deviation angle
0.89	4.27	51.35	-5.8
1.41	12.16	48.64	-5.88
2.68	19.25	39.83	-6.04
4.2	26.31	38.5	-6.2
5.72	33.77	39.25	-6.3
8.51	39.51	43.62	-6.37
10.45	41.3	59.1	-6.34
11.55	40.22	71.26	-6.3
12.75	36.8	82.62	-6.24
14.95	28.01	111.5	-6.09
16.05	21.25	123.33	-6
17.7	10.75	135.77	-5.85
19.11	2.66	143.17	-5.72
21.25	-10.3	143.53	-5.53
22.94	-17.94	145.22	-5.37
25.81	-22.69	141.32	-5.15
28.29	-22.48	120.54	-4.99
29.65	-16.98	106.69	-4.93
30.58	-12.06	94.53	-4.89
32.96	-2.42	70.87	-4.83
34.15	3.09	60.4	-4.81
36.03	14.78	53.31	-4.81
38.22	29.08	52.95	-4.84
40.93	40.79	54.68	-4.9
44.22	43.9	67.81	-5
45.16	43.14	78.45	-5.02
47.93	35.75	110.7	-5.08
48.86	31.39	117.46	-5.09
50.68	18.13	135.25	-5.1
51.7	7.65	139.62	-5.08
54.16	-7.89	142.7	-5.01
56.7	-18.71	139.71	-4.86
58.5	-23.86	134.67	-4.7
60.35	-26.83	120.97	-4.49
63.51	-25.49	91.41	-4.01
64.7	-22.53	81.95	-3.79
66.66	-12.36	55.26	-3.4
67.85	-4.77	46.81	-3.14
70.64	10.78	42.41	-2.46
73.01	24.8	43.42	-1.85
74.88	33.35	44.43	-1.34
77.25	40.37	56.61	-0.69
78.84	42.25	75.84	-0.27
79.96	41.37	91.26	0.03
81.79	35.64	117.72	0.49
83.31	28.11	127.52	0.86
84.48	21.4	140.69	1.12
88.04	-0.79	143.38	1.81
90.14	-10	145.62	2.11
92.59	-20.14	140.97	2.38
95.39	-22.85	123.53	2.54
97.71	-20.5	96.4	2.56
99.24	-13.3	81.87	2.53
100.94	-1.51	65.99	2.44
102.38	6.9	54.16	2.34
104.84	21.63	50.1	2.1
108.82	41.65	54.04	1.6
111.1	44.97	68.67	1.29
112.7	44.95	86.57	1.08
114.75	43.32	112.3	0.83
117.37	34.53	130.14	0.55
119.19	21.88	141.62	0.42
121.28	9.86	140.88	0.32
124.36	-14.18	137.9	0.33
126.22	-21.84	129.11	0.43
128.52	-27.57	107.82	0.66
130.1	-28.67	81.57	0.89
133.74	-25.64	56.96	1.62
135	-16.18	50.33	1.93
136.92	-2.63	42.26	2.46
139.73	13.54	43.42	3.33
142.51	30.05	44.61	4.27
144.71	38.19	75.78	5.03
147.48	41.35	102.37	5.99
149.25	37.61	120.61	6.57
149.79	35.14	126.78	6.74

## Sheet: SAC_forewing
t	flapping angle	rotational angle	deviation angle
0.81	-6.35	77.52	0
3.29	1.1	65.36	-0.2
5.28	9.46	57.61	-0.03
7.76	24.11	52.79	0.6
10.06	36.34	53.22	1.41
12.35	43.94	55.58	2.1
14.03	47.41	61.68	2.36
15.71	49.83	73.82	2.35
17.32	50.58	94.5	2.12
19.68	48.91	114.13	1.53
21.66	43.74	129.62	1.04
23.53	35.55	140.19	0.74
26.13	22.87	142.22	0.7
28	14.69	142.22	0.84
29.92	7.05	140.86	0.99
31.54	2.38	124.96	0.99
32.84	-0.75	111.08	0.86
35.01	-4.65	89.96	0.4
37.62	-3.51	67.09	-0.35
38.55	-1.95	55.75	-0.59
41.41	6.57	51.52	-0.9
43.89	19.87	51.86	-0.45
46.19	29.15	52.88	0.45
48.67	40.37	65.06	1.56
50.72	46.45	91.38	2.22
53.51	49.21	117.51	2.43
56.68	48.32	139.85	1.77
61.33	32.91	140.58	0.61
64.13	15.99	138.78	0.48
65.74	9.48	125.64	0.56
67.91	1.88	111.08	0.69
70.21	-6.01	95.42	0.66
73.06	-8.71	76.62	0.31
75.55	-8.23	65.4	-0.07
76.79	-6.19	61.34	-0.18
79.33	6.51	53.47	-0.05
83.06	24.94	52.88	0.99
85.98	39.18	53.89	1.96
87.96	45.91	65.74	2.34
89.89	49.49	78.9	2.35
92.37	50.21	106.68	1.92
94.48	48.82	126.76	1.36
95.85	45.63	140.86	1.04
98.39	34.68	144.92	0.69
101.37	21.92	142.89	0.77
102.86	13.89	141.2	0.9
105.34	4.42	122.93	1
108.01	-3.3	96.23	0.68
109.81	-3.98	77.62	0.23

## Sheet: SAC_hindwing
t	flapping angle	rotational angle	deviation angle
0.99	-7.88	79.03	-0.71
3.1	0.37	67.15	-0.26
5.09	6.79	56.96	0.02
6.95	16.62	51.53	0.15
8.81	26.51	50.85	0.14
11.42	39.37	51.87	-0.05
13.66	46.63	60.7	-0.34
16.08	52.11	74.96	-0.71
18	52.52	92.95	-1.01
20.49	47.79	117.16	-1.32
22.35	39.61	137.1	-1.47
23.78	30.23	143.55	-1.53
26.44	20.4	144.57	-1.48
27.87	13.84	144.54	-1.38
29.86	5.35	140.3	-1.17
32.09	-2.8	124.66	-0.85
34.51	-5.76	98.05	-0.48
35.63	-5.81	82.43	-0.31
37.12	-4.02	69.86	-0.1
38.86	-0.42	57.85	0.11
40.78	6.71	50.05	0.28
43.33	17.22	49.83	0.39
45.94	30.14	51.19	0.36
47.61	36.59	61.51	0.27
49.35	43.04	76.79	0.14
51.4	49.9	98.39	-0.05
53.32	51.53	114.35	-0.25
56.43	48.47	139.35	-0.58
59.47	39.98	142.84	-0.85
62.45	25.72	141.27	-1.07
63.94	15.87	138.42	-1.16
66.3	4	127.59	-1.27
68.16	-4.19	112.99	-1.35
71.26	-9.59	88.86	-1.47
74.12	-9.59	75.6	-1.56
77.97	-0.76	56.09	-1.63
80.58	11.46	50.74	-1.61
83.74	27.08	51.86	-1.51
85.79	38.41	54.92	-1.38
87.47	44.39	70.54	-1.24
90.51	51.44	96.01	-0.95
91.81	52.21	111.74	-0.83
96.16	45.38	140.49	-0.52
100.87	25.04	142.66	-0.6
103.79	12.48	138.38	-0.96
105.9	2.82	114.01	-1.36
107.58	-3.57	94.31	-1.75
110	-6.54	75.35	-2.36
